# Supplementary material for: Somatic diversification in the absence of antigen-driven responses is the hallmark of the IgM+IgD+CD27+ B cell repertoire in infants
Source: PubMed Central journal article supplement — J Exp Med. 2008 Jun 9;205(6):1331–42. doi: 10.1084/jem.20071555 (PMC2413031; doi:10.1084/jem.20071555), 2008-06-09
Supplement: jem.20071555_3.pdf [file jem.20071555_3.pdf]

Weller et al., <http://www.jem.org/cgi/content/full/jem.20071555/DC1>

## SUPPLEMENTAL MATERIALS AND METHODS

### H-CDR3 spectratyping

Total RNA from  $4 \times 10^4$  sorted cells was isolated with the RNeasy Micro Kit (QIAGEN) and reverse transcribed by random priming with the ProSTAR First Strand Reverse Transcription-PCR Kit (Stratagene). The volume of cDNA was then adjusted to achieve an equivalent number of cells per microliter, depending on the initial number of cells in each sorted fraction. For H-CDR3 size spectratyping,  $V_H$ 5.51,  $V_H$ 6,  $V_H$ 3.15,  $V_H$ 3.30/33, and  $V_H$ 3.23  $\mu$  and  $\gamma$  transcripts were amplified with a seminested strategy. In a first step and for each  $V_H$ , three independent PCR amplifications were performed on cDNA aliquots (each being equivalent to  $\sim 4,000$  cells) with Pfu turbo polymerase (Stratagene), using forward  $V_H$ -leader-specific primers with the appropriate reverse primers specific for the  $C_H1$  region of the  $\mu$  ( $\mu C_H1$ ) or the  $\gamma$  heavy chain ( $\gamma CH1$ ).

Amplification was performed as follows: 20 cycles of 45 s at 94°C, 1 min at 62°C, and 1 min 30 s at 72°C. The PCR products were then pooled, purified with the NucleoSpin Extract II kit (Macherey-Nagel), and subjected to seminested PCR (in triplicate) with Phusion DNA polymerase for 20 cycles (10 s at 98°C, 20 s at 60°C, and 20 s at 72°C) using the same  $\mu C_H1$  or  $\gamma C_H1$  primers with internal  $V_H$ -FR1 primers. PCR products of the expected size ( $\sim 400$  bp) were gel purified and fluorescently labeled using a run-off procedure, and, in some cases, aliquots were size separated on a polyacrylamide gel when sequencing was required (see below). The run-off reaction consisted of 10 cycles of 30 s at 94°C, 30 s at 58°C and 1 min at 72°C, with Taq DNA polymerase (Biolabs) and a specific  $V_H$ -FR3 primer labeled 5' with the fluorescent dye HEX. The run-off products were subjected to electrophoresis on an ABI PRISM 3100 genetic analyzer, in the presence of the GeneScan 400HD ROX Size Standard and were analyzed with Genemapper version 4 (both from Applied Biosystems). The different spectratypes shown in Fig. 1, Fig. 2 and Fig. S1 were thus performed using a cDNA volume equivalent to at least 10–12,000 B cells, but similar profiles were obtained when using an equivalent of 5–6,000 B cells (not depicted). Moreover, a spectratyping of the  $V_H$ 5.51 gene performed on either DNA or RNA, extracted with the AllPrep DNA/RNA Mini Kit (QIAGEN) from the same pool of  $10^5$  cells (either IgD<sup>+</sup>CD27<sup>+</sup>, IgD<sup>-</sup>CD27<sup>+</sup>, or naive cells) gave similar results, thus excluding a bias in analysis that could be introduced by the presence of CD20<sup>+</sup> plasmablasts. For each spectratype, the Genemapper software provided tables of size (base pair) and peak heights, with peak height proportional to the total number of H-CDR3 fragments of a given size. Considering only peaks above a chosen cutoff point ( $\geq 2.5\%$  of maximal peak intensity for a given experiment), mean peak size was equal to the sum of [size  $\times$  heights] divided by the total of peak heights. Taking into account the localization of the  $\mu C_H1$ ,  $\gamma C_H1$ , and FR3 primers, mean HCDR3 size can be inferred from mean peak size.

In parallel, for intrapeak sequence analysis, aliquots of the  $V_H$ -FR1  $\mu/\gamma$  nested PCR were size-fractionated on a 5% polyacrylamide-7 M urea gel and visualized by silver staining with Silver Sequence DNA Staining reagents (Promega). Individual bands of interest (corresponding to a given CDR3 length) were excised from the gel, reamplified (same conditions as for the seminested PCR), and sequenced, to evaluate the clonal diversity of each peak.

The following primers (Sigma-Aldrich) were used for H-CDR3 spectratyping:  $V_H$ 6-Leader, 5'-GTCTGTCTCCTTCCTCATCTTCC-3';  $V_H$ 3.15-Leader, 5'-CTGAGCTGGATTTTCCCTTGC-3';  $V_H$ 3.23-Leader, 5'-CTGAGCTGGCTTTTCTTGTG-3';  $V_H$ 3.30/33-Leader, 5'-GTTTTCTCGTTGCTCTTTTAAG-3';  $V_H$ 5.51-Leader, 5'-GGTCAACCGCCATCCTCGC-3';  $V_H$ 6-FR1, 5'-CCTCGCAGACCCTCTCAC-3';  $V_H$ 3.15-FR1, 5'-TTGGTAAAGCCTGGGGGGTC-3';  $V_H$ 3.23-FR1, 5'-AGTGTGAGGTG-CAGCTGTTG-3';  $V_H$ 3.30/33-FR1, 5'-GGCGTGGTCCAGCCTGGGA-3';  $V_H$ 5.51-FR1, 5'-GGTGAAAAAGCCCGGGGAG-3';  $V_H$ 6-FR3 HEX, 5'-TGTGACTCCCAGGACACG-3';  $V_H$ 3.15-FR3 HEX, 5'-CACAGCCGTGTATTACTGTAC-3';  $V_H$ 3.23-FR3 HEX, 5'-CACGGCCGTATATTACTGTGC-3';  $V_H$ 3.30/33-FR3 HEX, 5'-ACACGGCTGTGTATTACTGTG-3';  $V_H$ 5.51-FR3 HEX, 5'-AGGCCTCGGACCCGCGCATG-3';  $\mu C_H1$ , 5'-AAAAGGGTTGGGGCCGGATGCAC-3';  $\gamma CH1$ , 5'-AAGACCGATGGGCCCTTGGTGG-3'.

The  $J_H4$ - $J_H5$  intronic region was amplified with a mixture of 6 FR3 primers: FR3#1, 5'-GACACGGCTGTGTAT-TACTGTGC-3' FR3#2, 5'-GACACGGCCGTGTATTACTGTGC-3' FR3#3 5'-GACACCGCCATGTATTACTGTGC-3' FR3#4, 5'-GACACAGCCACATATTACTGTGC-3' FR3#5, 5'-GACACAGCCGTGTATTACTGTAC-3' FR3#6, 5'-GACACGGCCTTGTATTACTGTGC-3' mixed in a 5:7:1:1:1:1 ratio), and a primer binding 5' to the  $J_H5$  exon: jH4-5, 5'-GTCGAACCAGTTGTACATTGTG-3'.

**Table S1.** Intrapeak clonal diversity of spectratyping analysis (donor 1 and 2, 11 mo, blood)

| Donor | B cell subset                      | Transcripts           | Peak analyzed <sup>a</sup><br>(H-CDR3 size <sup>b</sup> ) | Total number of sequences | Number of different VDJ junctions | Clonal diversity |
|-------|------------------------------------|-----------------------|-----------------------------------------------------------|---------------------------|-----------------------------------|------------------|
| D1    | IgD <sup>+</sup> CD27 <sup>+</sup> | V <sub>H</sub> 6 μ    | (10 aa)<br>No. 1                                          | 33                        | 30                                | 91%              |
|       |                                    |                       | (10 aa)<br>No. 2                                          | 24                        | 21                                | 87%              |
|       |                                    |                       | (11 aa)<br>No. 3                                          | 32                        | 28                                | 87%              |
|       |                                    |                       | (12 aa)<br>No. 4                                          | 15                        | 13                                | 87%              |
| D1    | Naive                              | V <sub>H</sub> 6 μ    | (13 aa)<br>No. 1                                          | 13                        | 9                                 | 70%              |
|       |                                    |                       | (12 aa)<br>No. 2                                          | 20                        | 15                                | 75%              |
|       |                                    |                       | (13 aa)<br>No. 3                                          | 9                         | 9                                 | 100%             |
|       |                                    |                       | (14 aa)<br>No. 4                                          | 14                        | 12                                | 86%              |
| D1    | Switched                           | V <sub>H</sub> 6 γ    | (15 aa)<br>No. 1                                          | 19                        | 6                                 | 31%              |
|       |                                    |                       | (11 aa)<br>No. 2                                          | 21                        | 6                                 | 28%              |
|       |                                    |                       | (12 aa)<br>No. 3                                          | 13                        | 5                                 | 38%              |
|       |                                    |                       | (14 aa)<br>No. 4                                          | 14                        | 1                                 | 7%               |
| D2    | IgD <sup>+</sup> CD27 <sup>+</sup> | V <sub>H</sub> 3.15 μ | (17 aa)<br>No. 1                                          | 22                        | 9                                 | 41%              |
|       |                                    |                       | (9 aa)<br>No. 2                                           | 21                        | 14                                | 66%              |
|       |                                    |                       | (10 aa)<br>No. 3                                          | 18                        | 12                                | 66%              |
|       |                                    |                       | (11 aa)<br>No. 4                                          | 21                        | 17                                | 81%              |
| D2    | Naive                              | V <sub>H</sub> 3.15 μ | (12 aa)<br>No. 1                                          | 23                        | 12                                | 52%              |
|       |                                    |                       | (11 aa)<br>No. 2                                          | 20                        | 14                                | 70%              |
|       |                                    |                       | (12 aa)<br>No. 3                                          | 20                        | 13                                | 65%              |
|       |                                    |                       | (13 aa)<br>No. 4                                          | 21                        | 13                                | 62%              |
| D2    | Switched                           | V <sub>H</sub> 3.15 γ | (14 aa)<br>No. 1                                          | 24                        | 1                                 | 4%               |
|       |                                    |                       | (11 aa)<br>No. 2                                          | 16                        | 1                                 | 6%               |
|       |                                    |                       | (14 aa)                                                   |                           |                                   |                  |

<sup>a</sup>The peaks that were analyzed are identified by an asterisk in Fig. 1, and they are numbered in order of appearance from left to right.

<sup>b</sup>H-CDR3 size in aa from the residue after the last V<sub>H</sub>-encoded Cys to the last residue before the J<sub>H</sub>-encoded Trp.

**Table S2.** Intrapeak clonal diversity of spectratyping analysis (donor 3, 8 mo, spleen)

| B cell subset                                         | Transcripts           | Peak analyzed <sup>a</sup><br>(H-CDR3 size <sup>b</sup> ) | Total number of<br>sequences | Number of different<br>VDJ junctions | Clonal<br>diversity |
|-------------------------------------------------------|-----------------------|-----------------------------------------------------------|------------------------------|--------------------------------------|---------------------|
| IgD <sup>+</sup> CD27 <sup>+</sup>                    | V <sub>H</sub> 3.15 μ | No. 1<br>(12 aa)                                          | 21                           | 21                                   | 100%                |
|                                                       |                       | No. 2<br>(13 aa)                                          | 19                           | 18                                   | 95%                 |
|                                                       |                       | No. 3<br>(14 aa)                                          | 18                           | 17                                   | 94%                 |
| Naive                                                 | V <sub>H</sub> 3.15 μ | No. 1<br>(15 aa)                                          | 29                           | 28                                   | 97%                 |
|                                                       |                       | No. 2<br>(16 aa)                                          | 27                           | 21                                   | 77%                 |
|                                                       |                       | No. 3<br>(17 aa)                                          | 15                           | 15                                   | 100%                |
| IgD <sup>-</sup> CD27 <sup>+</sup><br>(Switched + GC) | V <sub>H</sub> 3.15 γ | No. 1<br>(14 aa)                                          | 29                           | 13                                   | 45%                 |
|                                                       |                       | No. 2<br>(15 aa)                                          | 22                           | 15                                   | 68%                 |
|                                                       |                       | No. 3<br>(16 aa)                                          | 22                           | 7                                    | 32%                 |
| CD38 <sup>+</sup> CD24 <sup>-</sup><br>(GC)           | V <sub>H</sub> 3.15 μ | No. 1<br>(17 aa)                                          | 20                           | 10                                   | 50%                 |
|                                                       |                       | No. 2<br>(13 aa)                                          | 19                           | 12                                   | 63%                 |
|                                                       |                       | No. 3<br>(14 aa)                                          | 23                           | 13                                   | 57%                 |
|                                                       |                       | No. 4<br>(15 aa)                                          | 23                           | 13                                   | 57%                 |
|                                                       |                       | No. 5<br>(16 aa)                                          | 22                           | 11                                   | 50%                 |
|                                                       |                       | No. 6<br>(17 aa)                                          | 26                           | 12                                   | 46%                 |
| CD38 <sup>+</sup> CD24 <sup>-</sup><br>(GC)           | V <sub>H</sub> 3.15 γ | No. 1<br>(20 aa)                                          | 16                           | 5                                    | 31%                 |
|                                                       |                       | No. 2<br>(12 aa)                                          | 23                           | 13                                   | 57%                 |
|                                                       |                       | No. 3<br>(13 aa)                                          | 20                           | 13                                   | 65%                 |
|                                                       |                       | No. 4<br>(14 aa)                                          | 19                           | 9                                    | 47%                 |
|                                                       |                       | No. 5<br>(15 aa)                                          | 20                           | 11                                   | 55%                 |
|                                                       |                       | No. 6<br>(16 aa)                                          |                              |                                      |                     |

<sup>a</sup>The peaks that were analyzed are identified by an asterisk in Fig. 2, and they are numbered in order of appearance, from left to right.

<sup>b</sup>H-CDR3 size in aa, from the residue after the last V<sub>H</sub>-encoded Cys to the last residue before the J<sub>H</sub>-encoded Trp.

**Table S3.** Intrapeak clonal diversity of spectratyping analysis (donor 3, 8 mo, spleen)

| B cell subset                                         | Transcripts        | Peak analyzed <sup>a</sup><br>(H-CDR3 size <sup>b</sup> ) | Total number of<br>sequences | Number of different<br>VDJ junctions | Clonal<br>diversity |
|-------------------------------------------------------|--------------------|-----------------------------------------------------------|------------------------------|--------------------------------------|---------------------|
| IgD <sup>+</sup> CD27 <sup>+</sup>                    | V <sub>H</sub> 6 μ | No. 1                                                     | 23                           | 20                                   | 87%                 |
|                                                       |                    | (10 aa)<br>No. 2                                          | 16                           | 16                                   | 100%                |
|                                                       |                    | (11 aa)<br>No. 3                                          | 19                           | 14                                   | 73.5%               |
|                                                       |                    | (12 aa)<br>No. 4                                          | 10                           | 8                                    | 80%                 |
| Naive                                                 | V <sub>H</sub> 6 μ | (14aa)<br>No. 1                                           | 21                           | 15                                   | 71.5%               |
|                                                       |                    | (12 aa)<br>No. 2                                          | 21                           | 13                                   | 62%                 |
|                                                       |                    | (13 aa)<br>No. 3                                          | 14                           | 8                                    | 57%                 |
| IgD <sup>-</sup> CD27 <sup>+</sup><br>(Switched + GC) | V <sub>H</sub> 6 γ | (15 aa)<br>No. 1                                          | 16                           | 6                                    | 37.5%               |
|                                                       |                    | (11 aa)<br>No. 2                                          | 15                           | 4                                    | 26.5%               |
|                                                       |                    | (13 aa)<br>No. 3                                          | 19                           | 2                                    | 10.5%               |
| CD38 <sup>+</sup> CD24 <sup>-</sup><br>(GC)           | V <sub>H</sub> 6 μ | (17 aa)<br>No. 1                                          | 24                           | 2                                    | 8.5%                |
|                                                       |                    | (10 aa)<br>No. 2                                          | 16                           | 3                                    | 18.75%              |
|                                                       |                    | (14 aa)<br>No. 3                                          | 15                           | 3                                    | 20%                 |
| CD38 <sup>+</sup> CD24 <sup>-</sup><br>(GC)           | V <sub>H</sub> 6 γ | (17 aa)<br>No. 1                                          | 13                           | 1                                    | 7.7%                |
|                                                       |                    | (13 aa)<br>No. 2                                          | 24                           | 1                                    | 4.2%                |
|                                                       |                    | (16 aa)<br>No. 3                                          | 20                           | 2                                    | 10%                 |
|                                                       |                    | (17 aa)<br>No. 4<br>(20 aa)                               | 19                           | 1                                    | 10.5%               |

<sup>a</sup>The peaks that were analyzed are identified by an asterisk in Fig. 2, and they are numbered in order of appearance, from left to right.

<sup>b</sup>H-CDR3 size in amino acids (aa), from the residue after the last V<sub>H</sub>-encoded Cys to the last residue before the J<sub>H</sub>-encoded Trp.

**Table S4.** V<sub>H</sub>5.51 repertoire analysis of the splenic B cell subsets of a 23-mo-old child (D7)

| B cell subset                                         | Transcripts           | Peak analyzed <sup>a</sup><br>(H-CDR3 size <sup>b</sup> ) | Total number of<br>sequences | Number of<br>different VDJ<br>junctions | Clonal<br>diversity | P value <sup>c</sup> |
|-------------------------------------------------------|-----------------------|-----------------------------------------------------------|------------------------------|-----------------------------------------|---------------------|----------------------|
| IgD <sup>+</sup> CD27 <sup>+</sup>                    | V <sub>H</sub> 5.51 μ | No. 1                                                     | 19                           | 19                                      | 100%                |                      |
|                                                       |                       | (11 aa)<br>No. 2                                          | 20                           | 20                                      | 100%                |                      |
|                                                       |                       | (12 aa)<br>No. 3                                          | 22                           | 20                                      | 91%                 |                      |
|                                                       |                       | (14 aa)<br>No. 4                                          | 17                           | 12                                      | 70.5%               |                      |
| Naive                                                 | V <sub>H</sub> 5.51 μ | (15 aa)<br>Total:                                         | 78                           | 71                                      | 91%                 |                      |
|                                                       |                       | No. 1                                                     | 20                           | 19                                      | 95%                 |                      |
|                                                       |                       | (12 aa)<br>No. 2                                          | 19                           | 14                                      | 73.5%               |                      |
|                                                       |                       | (14 aa)<br>No. 3                                          | 19                           | 18                                      | 94.5%               |                      |
| IgD <sup>-</sup> CD27 <sup>+</sup><br>(Switched + GC) | V <sub>H</sub> 5.51 γ | (16 aa)<br>No. 4                                          | 13                           | 13                                      | 100%                |                      |
|                                                       |                       | (18 aa)<br>Total:                                         | 71                           | 64                                      | 90%                 |                      |
|                                                       |                       | No. 1                                                     | 18                           | 9                                       | 50%                 |                      |
|                                                       |                       | (11 aa)<br>No. 2                                          | 22                           | 10                                      | 45.5%               |                      |
|                                                       |                       | (12aa)<br>No. 3                                           | 15                           | 8                                       | 53.5%               |                      |
|                                                       |                       | (13aa)<br>No. 4                                           | 15                           | 5                                       | 33.5%               |                      |
|                                                       |                       | (14 aa)<br>Total:                                         | 70                           | 32                                      | 45%                 |                      |
|                                                       |                       |                                                           |                              |                                         |                     | 3 × 10 <sup>-9</sup> |

<sup>a</sup>The peaks that were analyzed are identified by an asterisk in Fig. S1, and they are numbered in order of appearance from left to right.

<sup>b</sup>H-CDR3 size in aa, from the residue after the last V<sub>H</sub>-encoded Cys to the last residue before the J<sub>H</sub>-encoded Trp.

<sup>c</sup>Statistical significance (see Materials and methods) of differences in clonal diversity between IgD<sup>+</sup>CD27<sup>+</sup> and IgD<sup>-</sup>CD27<sup>+</sup> cells of the same donor.
